# Supplementary material for: Fluoride-free and low concentration template synthesis of hierarchical Sn-Beta zeolites: efficient catalysts for conversion of glucose to alkyl lactate
Source: Royal Society of Chemistry journal article supplement (doi:10.1039/c6gc02437h), 2016-10-28
Supplement: c6gc02437h1.pdf [file c6gc02437h1.pdf]

Electronic Supplementary Information for

**Fluoride-free and low concentration template synthesis of hierarchical Sn-Beta zeolites: efficient catalyst for conversion of glucose to alkyl lactate**

Xiaomei Yang,<sup>a</sup> Jingjing Bian,<sup>a</sup> Jianhao Huang,<sup>a</sup> Weiwen Xin,<sup>a</sup> Tianliang Lu,<sup>b</sup> Chen Chen,<sup>c</sup> Yunlai Su,<sup>a</sup> Lipeng Zhou,<sup>a,\*</sup> Feng Wang,<sup>c</sup> Jie Xu<sup>c</sup>

<sup>a</sup> *College of Chemistry and Molecular Engineering, Zhengzhou University, 100 Kexue Road, Zhengzhou 450001, China*

<sup>b</sup> *School of Chemical Engineering and Energy, Zhengzhou University, 100 Kexue Road, Zhengzhou 450001, China*

<sup>c</sup> *State Key Laboratory of Catalysis, Dalian National Laboratory for Clean Energy, Dalian Institute of Chemical Physics, Chinese Academy of Sciences, 457 Zhongshan Road, Dalian 116023, China*

\* Corresponding author. Tel.: +86 371 67781780; fax: +86 371 67766076. *E-mail addresses:* [zhoulipeng@zzu.edu.cn](mailto:zhoulipeng@zzu.edu.cn)

## **Contents:**

**1. Additional Experimental Section (pp. 3-4)**

**2. Scheme S1 (p. 4)**

**3. Fig. S1-Fig. S8 (pp. 5-12)**

**4. Table S1-Table S3 (pp. 13-14)**

## 1. Experimental

### 1.1. Materials

The parent Al-Beta zeolites with Si/Al ratio of 38.1, 19.5 and 13.8 were purchased from Nankai University Catalyst Co. (China). Nitric acid (65-68%), hydrofluoric acid (40%),  $\text{SnCl}_4 \cdot 5\text{H}_2\text{O}$ , methanol, ethanol, *n*-butanol and naphthalene were purchased from commercial resources (AR grade). Tetraethyl orthosilicate (TEOS, AR grade), tetraethylammonium hydroxide (TEAOH, 25% aqueous solution) and ethyl lactate were purchased from Aladdin Reagent Co. (China). 1,3-Dihydroxyacetone dimer (97%, DHA), xylose and *n*-butyl lactate were obtained from J & K Scientific Ltd, China. Methyl lactate (> 98%, MLA) was purchased from TCI Shanghai, China. Glucose monohydrate was of analytic grade and purchased from Tianjin Fengchuan Chemical Reagent Factory. Fructose (99%) was purchased from Aladdin Reagent Co. (China). Mannose and sucrose were purchased from SCRC, Ltd. All chemicals were used as purchased without further purification.

### 1.2. Hydrothermal synthesis of Sn-Beta zeolite in fluoride medium

Sn-Beta zeolite synthesized directly by the hydrothermal method was designated as Sn-Beta-F. The hydrothermal method described in reference [1] was adopted to prepare Sn-Beta-F. 10.74 g TEAOH (25% aqueous solution) was mixed with 6.98 g TEOS in a plastic beaker. After stirring for 90 min, 0.74 g  $\text{SnCl}_4$  solution (0.14 g  $\text{SnCl}_4 \cdot 5\text{H}_2\text{O}$  dissolved in 0.6 g  $\text{H}_2\text{O}$ ) was added dropwise and white precipitate appeared. The mixture was continued to stir until EtOH and  $\text{H}_2\text{O}$  (total weight loss of 10.08 g) was evaporated. Then, 0.89 g HF (40% aqueous solution) was added, and the

dense gel was formed. Finally, the above dealuminated Beta seeds (0.083 g, ~4 wt% compared to the theoretical zeolite amount) were suspended in deionized water (0.58 g), sonicated and added into the dense gel. The molar ratio of the resulting gel was as follows: 0.008 SnO<sub>2</sub>: 1 SiO<sub>2</sub>: 0.54 TEAOH: 0.54 HF: 7.5 H<sub>2</sub>O. The gel was mixed homogeneously, transferred to a stainless steel autoclave lined with PTFE, and crystallized statically at 140 °C for 30 days. After crystallization, the autoclave was cooled down to room temperature quickly and the products were isolated by centrifugation. The products were washed three times with deionized water and dried at 100 °C overnight. The dried powder was calcined in muffle furnace at 550 °C for 8 h to remove carbonaceous residues.

## 2. Additional results

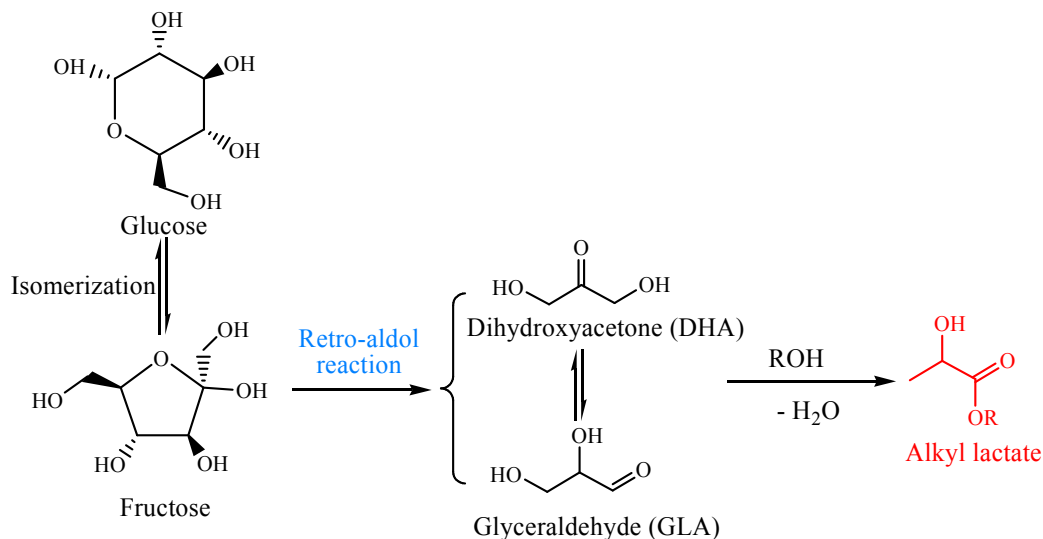

**Scheme S1** Proposed reaction pathway for the conversion of C<sub>6</sub> carbohydrate to alkyl lactate [1,2].

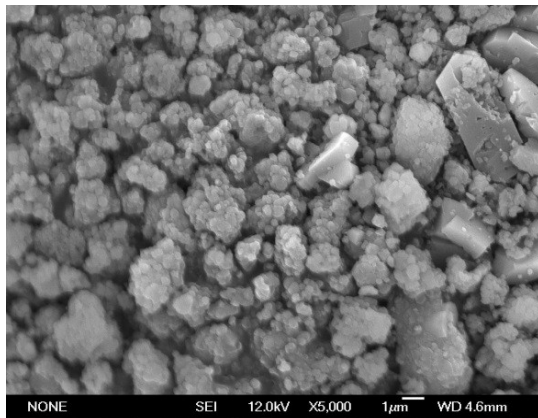

Al-Beta

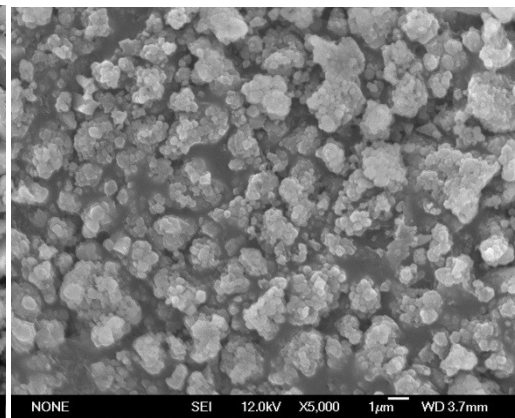

deAl-Beta

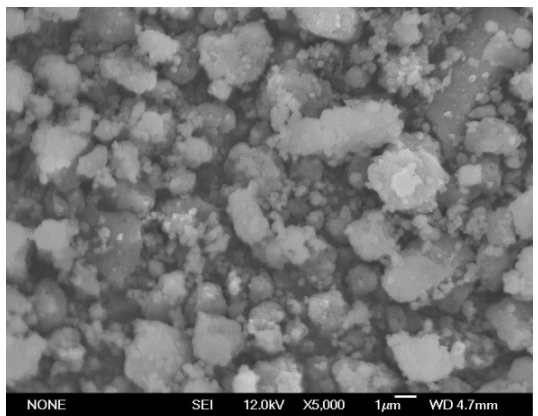

$x = 0.05$

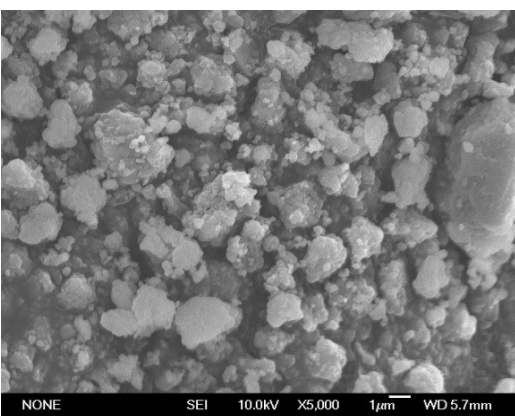

$x = 0.1$

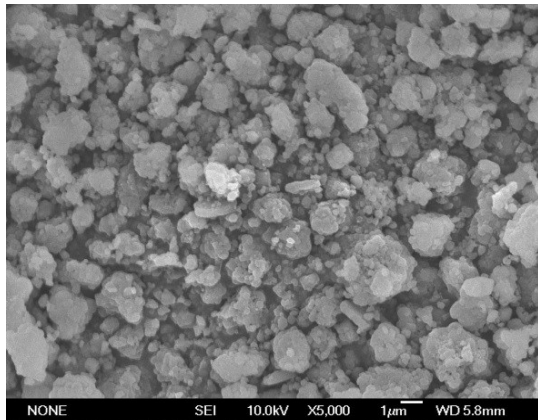

$x = 0.2$

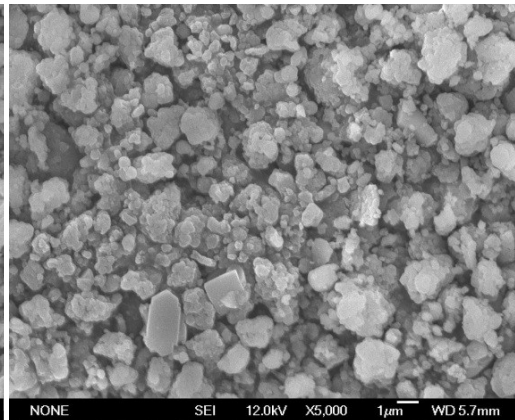

$x = 0.3$

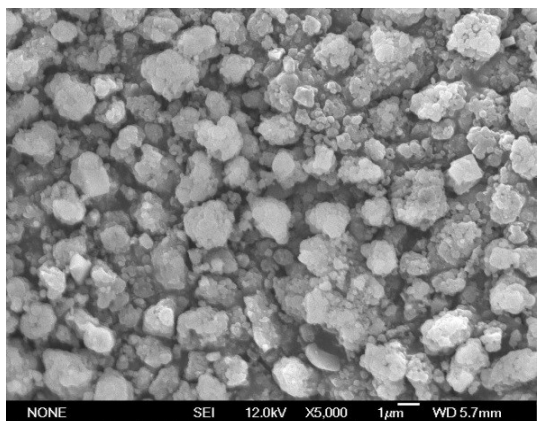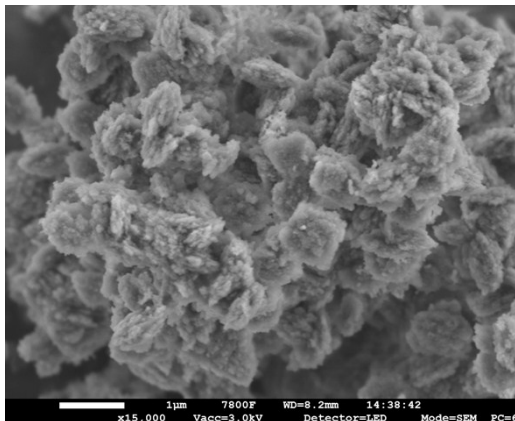

$x = 0.4$

Sn-Beta-F

**Fig. S1** SEM pictures of Al-Beta, deAl-Beta, Sn-Beta-H- $x$  ( $x$  represents the concentration of TEAOH.) and Sn-Beta-F.

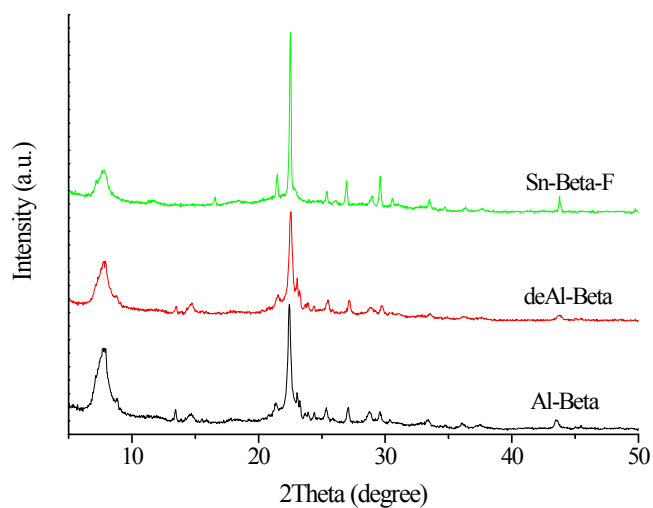

**Fig. S2** XRD patterns of Al-Beta, deAl-Beta and Sn-Beta-F.

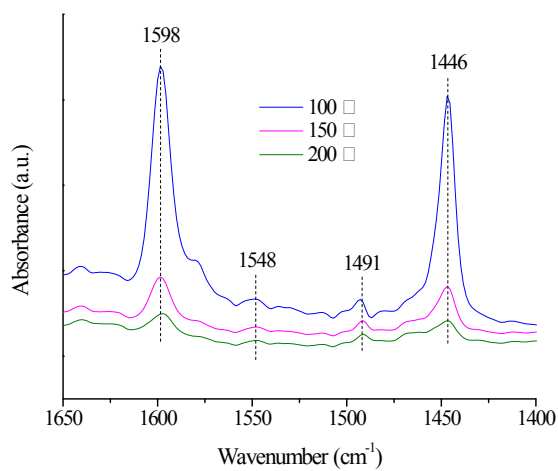

**Fig. S3** FT-IR spectra of pyridine adsorbed on deAl-Beta. The bands at 1446 cm<sup>-1</sup> and 1598 cm<sup>-1</sup> correspond to hydrogen-bonded pyridine.

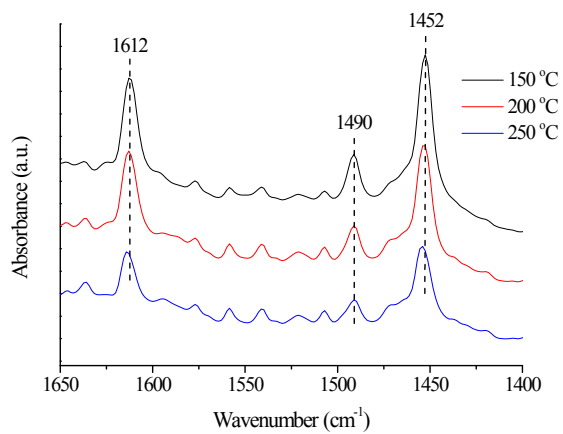

**Fig. S4** FT-IR spectra of pyridine adsorbed on Sn-Beta-F.

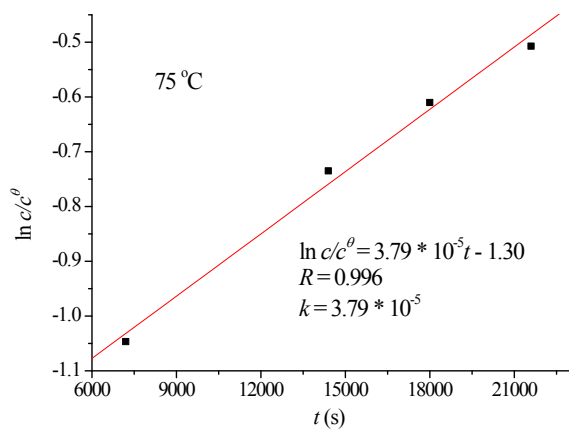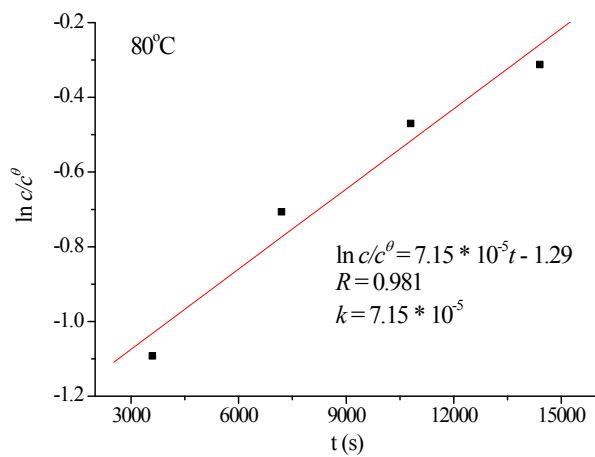

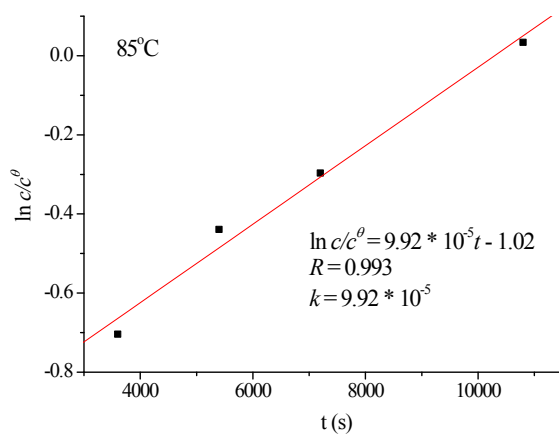

**Fig. S5** Kinetic analysis of MLA formation from fructose in methanol in the presence of Sn-Beta-H-0.3.

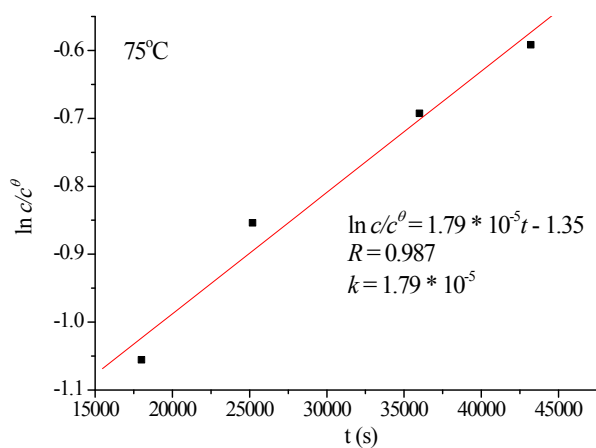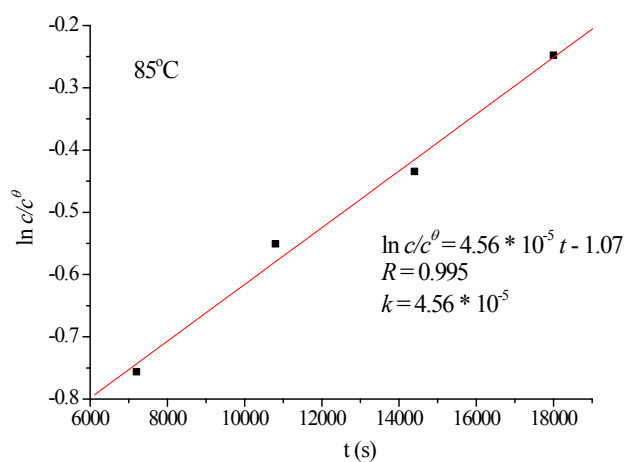



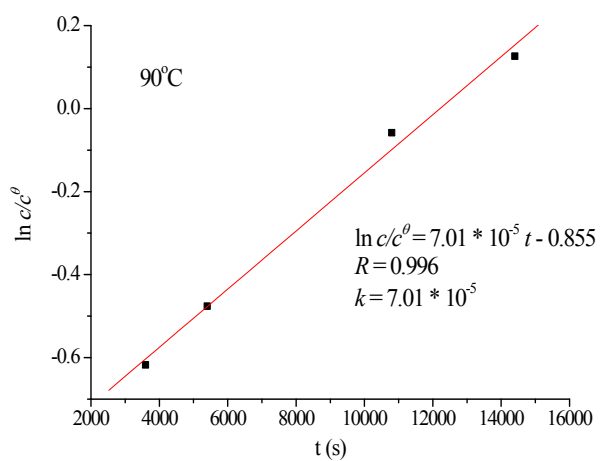

**Fig. S6** Kinetic analysis of MLA formation from fructose in methanol in the presence of Sn-Beta-F.

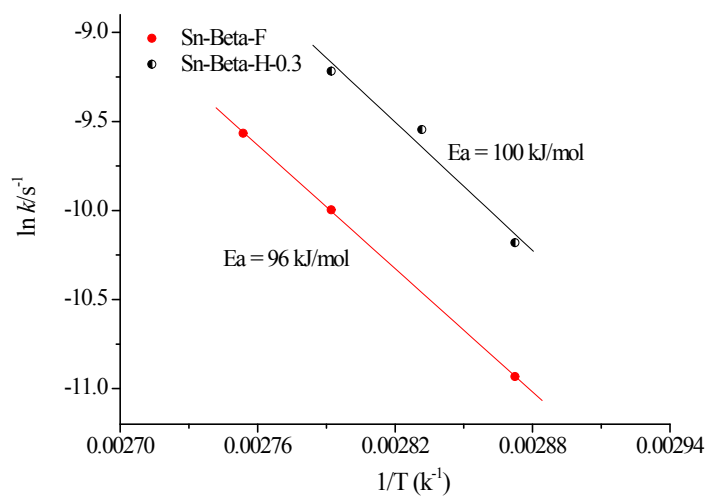

**Fig. S7** Arrhenius plots of the retro-aldol of fructose over Sn-Beta-H-0.3 and Sn-Beta-F.

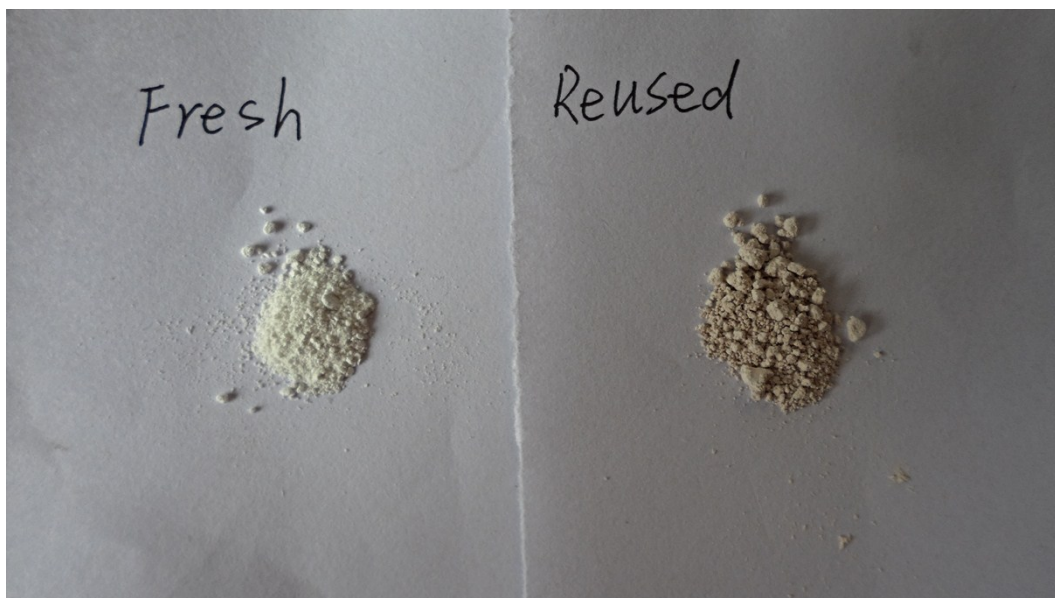

**Fig. S8** Photos of fresh and reused Sn-Beta-H-0.3.

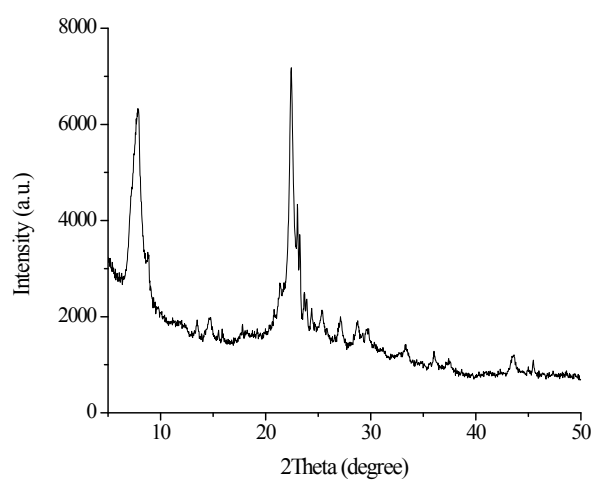

**Fig. S9** XRD pattern of reused Sn-Beta-H-0.3.

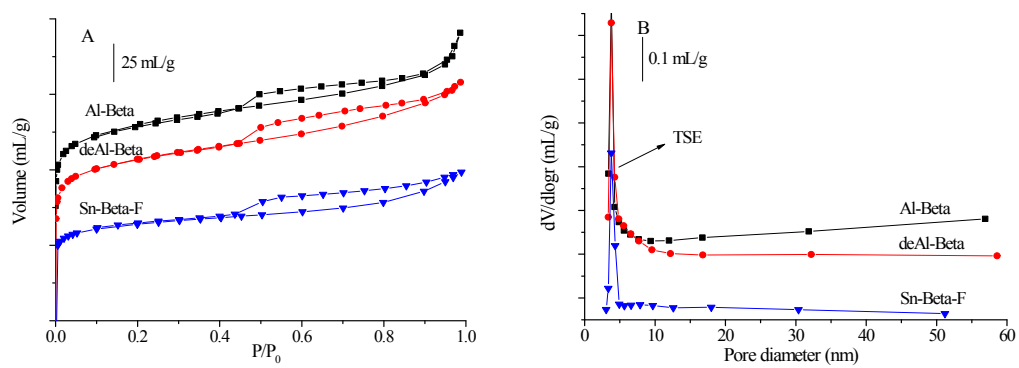

**Fig. S10** N<sub>2</sub> isotherms (A) and BJH-derived pore size distributions (B) of Al-Beta,

deAl-Beta and Sn-Beta-F.

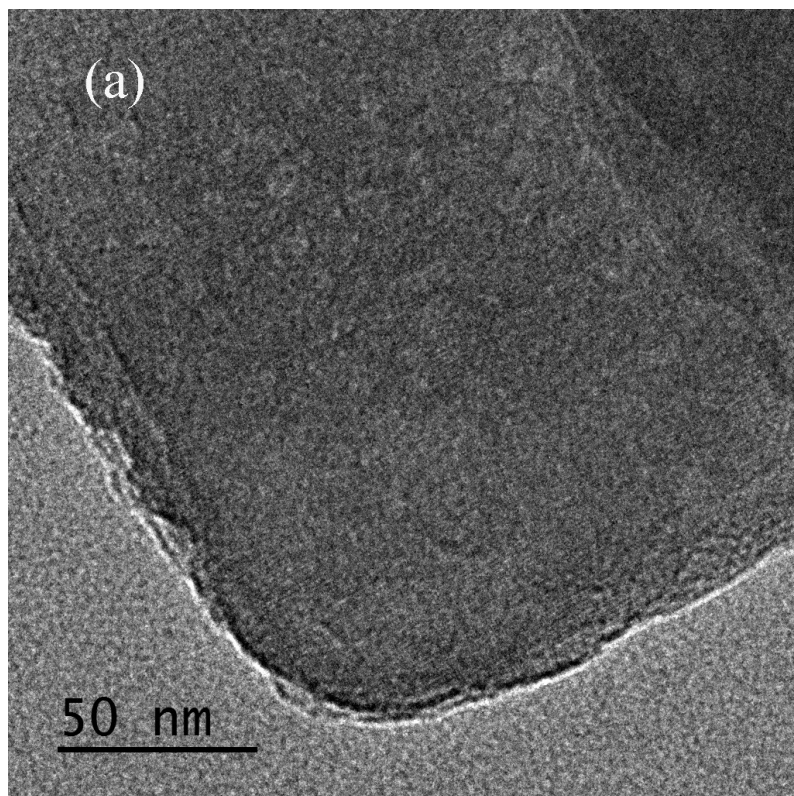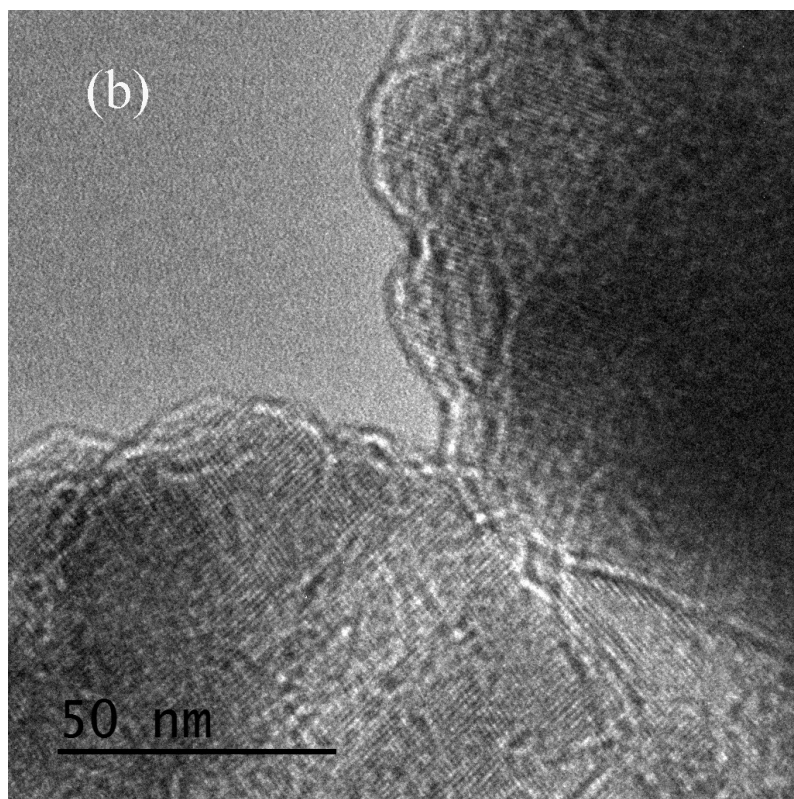

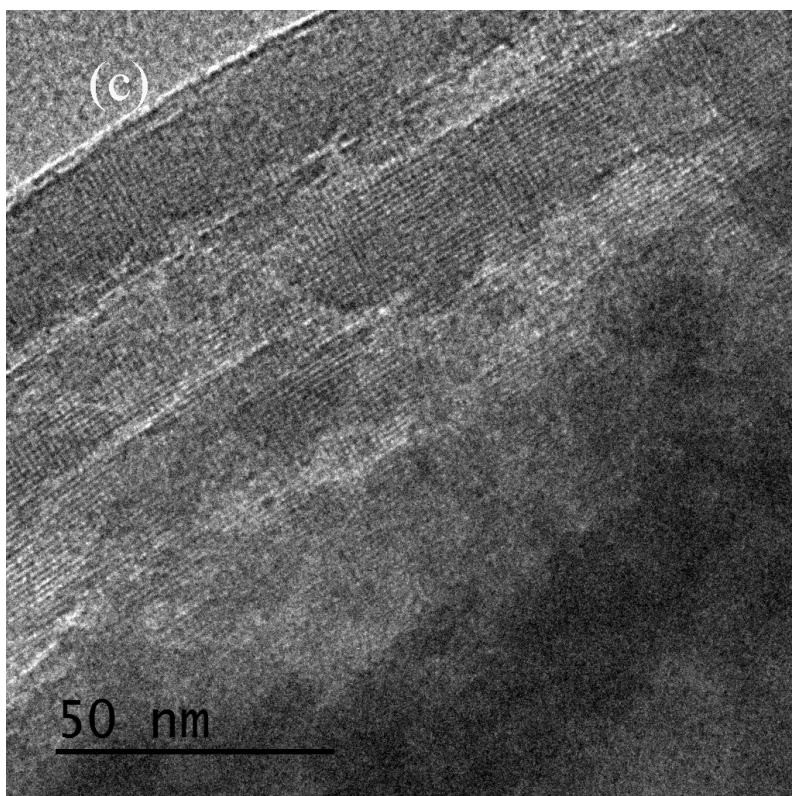

**Fig. S11** TEM images of (a) Sn-Beta-H-0.2, (b) Sn-Beta-H-0.3 and (c) Sn-Beta-H-0.4.

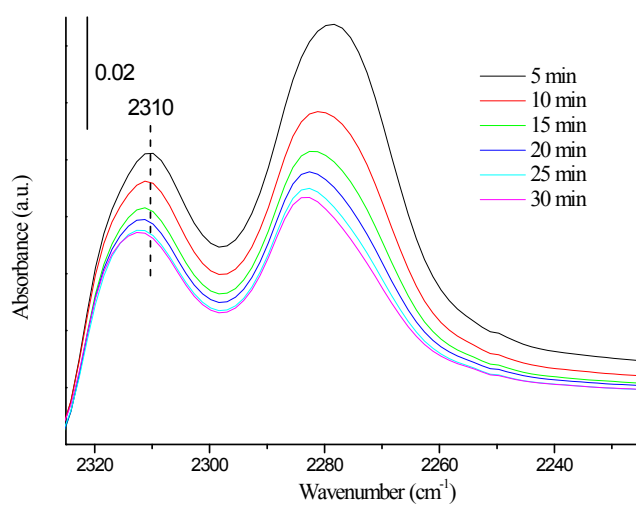

**Fig. S12** FT-IR spectra of CD<sub>3</sub>CN adsorbed on Sn-Beta-F. The spectra were measured after saturation of CD<sub>3</sub>CN on the samples followed by different desorption times at 25 °C.

**Table S1** TG results of Sn-Beta zeolites

| Sample         | Weight loss at different temperature region (wt%) |                 |               | Total weight loss (wt%) |
|----------------|---------------------------------------------------|-----------------|---------------|-------------------------|
|                | I (<200 °C)                                       | II (200-350 °C) | III (>350 °C) |                         |
| Sn-Beta-H-0.05 | 2.2                                               | 3.2             | 3.5           | 8.9                     |
| Sn-Beta-H-0.1  | 2.0                                               | 7.0             | 4.4           | 13.4                    |
| Sn-Beta-H-0.2  | 1.8                                               | 9.0             | 5.2           | 16.0                    |
| Sn-Beta-H-0.3  | 2.0                                               | 9.1             | 5.0           | 16.1                    |
| Sn-Beta-H-0.4  | 1.9                                               | 9.1             | 4.8           | 15.8                    |
| Sn-Beta-F      | 3.0                                               | 12.0            | 4.0           | 19.0                    |

**Table S2** Lewis acid density of Sn-Beta-H-0.3 and Sn-Beta-F

| Sample        | Lewis acid density ( $\mu\text{mol/g}$ ) |        |        |
|---------------|------------------------------------------|--------|--------|
|               | 150 °C                                   | 200 °C | 250 °C |
| Sn-Beta-H-0.3 | 331                                      | 245    | 158    |
| Sn-Beta-F     | 280                                      | 225    | 176    |

**Table S3** Comparison of pseudo-yield of retro-aldol reaction of fructose over Sn-Beta zeolites<sup>a</sup>

| Catalyst      | Yield of MLA (%) <sup>a</sup> |          | Pseudo-yield of retro-aldol reaction (%) <sup>b</sup> |
|---------------|-------------------------------|----------|-------------------------------------------------------|
|               | From fructose                 | From DHA |                                                       |
| Sn-Beta-H-0.3 | 17                            | 89       | 19                                                    |
| Sn-Beta-F     | 8                             | 93       | 9                                                     |

<sup>a</sup> Reaction conditions: 0.124 g carbohydrate, 80 mg catalyst, 5 mL methanol, 0.5 MPa

N<sub>2</sub>, 90 °C, 5 h.

<sup>b</sup> Pseudo-yield of retro-aldol reaction = (yield of MLA from fructose)/(yield of MLA from DHA).

**Table S4** Yield (%) of methyl lactate from glucose over Sn-Beta zeolites<sup>a</sup>

| Entry          | Sample         | From Al-Beta with Si/Al of 13.8 | From Al-Beta with Si/Al of 19.5 |
|----------------|----------------|---------------------------------|---------------------------------|
| 1              | Al-Beta        | 3                               | 3                               |
| 2              | deAl-Beta      | 16                              | 10                              |
| 3              | Sn-Beta-H-0.05 | 32                              | 36                              |
| 4              | Sn-Beta-H-0.1  | 46                              | 46                              |
| 5              | Sn-Beta-H-0.2  | 57                              | 55                              |
| 6              | Sn-Beta-H-0.3  | 59                              | 56                              |
| 7              | Sn-Beta-H-0.4  | 54                              | 56                              |
| 8 <sup>b</sup> | Sn-Beta-H-0.3  |                                 | 60                              |

<sup>a</sup> Reaction conditions: 0.124 g glucose, 80 mg catalyst, 5 mL methanol, 0.5 MPa N<sub>2</sub>, 160 °C, 10 h.

<sup>b</sup> Hydrothermally treated with solid to liquid ratio of 1 g/5 mL.

## Reference

- 1 M. S. Holm, S. Saravanamurugan and E. Taarning, *Science*, 2010, **328**, 602–605.
- 2 L. Zhou, L. Wu, H., X. Yang, Y. Su, T. Lu and J. Xu, *J. Mol. Catal. A: Chem.*, 2014, **388–389**, 74–80.
